# Supplementary material
Source: MDPI journal article supplement (https://www.mdpi.com/2073-4395/11/5/944)

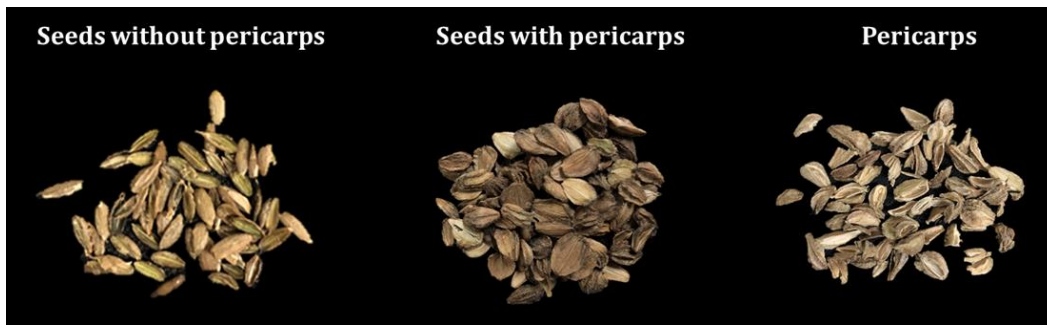

**Figure S1:** Seeds without pericarps, seed with pericarps, and only pericarps of coastal glehnia.

Supplement: s1 [file s1]
